# Supplementary material for: Evaluating complex interventions in context: systematic, meta-narrative review of case study approaches
Source: PubMed Central journal article supplement (PMC8543916; doi:10.1186/s12874-021-01418-3), 2021-10-25
Supplement: 12874_2021_1418_MOESM1_ESM.pdf [file 12874_2021_1418_MOESM1_ESM.pdf]

## APPENDIX 1 – SUMMARY OF SEARCH RESULTS (CYCLE 2)

| Database                                                                                                                                     | Interface                      | Coverage             | Date       | Hits        |
|----------------------------------------------------------------------------------------------------------------------------------------------|--------------------------------|----------------------|------------|-------------|
| Medline (Ovid MEDLINE® Epub Ahead of Print, In-Process & Other Non-Indexed Citations, Ovid MEDLINE® Daily and Ovid MEDLINE®) 1946 to present | OvidSP                         | 1946-present         | 22/11/2019 | 2175        |
| Embase                                                                                                                                       | OvidSP                         | 1974-present         | 22/11/2019 | 1032        |
| PsycINFO                                                                                                                                     | OvidSP                         | 1806-present         | 22/11/2019 | 783         |
| CAB Abstracts                                                                                                                                | OvidSP                         | 1973 to 2019 Week 36 | 22/11/2019 | 190         |
| Science Citation Index, Social Sciences Citation Index and Arts & Humanities Citation Index                                                  | Web of Science Core Collection | 1945-present         | 22/11/2019 | 1083        |
| ERIC                                                                                                                                         | EBSCOHost                      | 1966-present         | 22/11/2019 | 78          |
| CINAHL                                                                                                                                       | EBSCOHost                      | 1982-present         | 22/11/2019 | 1002        |
| ASSIA                                                                                                                                        | Proquest                       | 1987-present         | 22/11/2019 | 13          |
| Sociological Abstracts                                                                                                                       | Proquest                       | 1952-present         | 22/11/2019 | 10          |
| PAIS Index                                                                                                                                   | Proquest                       | 1914-present         | 22/11/2019 | 10          |
| <b>Total:</b>                                                                                                                                |                                |                      |            | <b>6376</b> |
| Duplicates removed:                                                                                                                          |                                |                      |            | 2151        |
| <b>Final Total:</b>                                                                                                                          |                                |                      |            | <b>4225</b> |
